# Supplementary material for: Water resources management and dynamic changes in water politics in the transboundary river basins of Central Asia
Source: Copernicus journal article supplement (doi:10.5194/hess-25-3281-2021), 2021-06-16
Supplement: Supplementary file 1 [file hess-25-3281-2021-supplement.pdf]

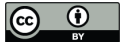

*Supplement of*

## **Water resources management and dynamic changes in water politics in the transboundary river basins of Central Asia**

**Xuanxuan Wang et al.**

*Correspondence to:* Zhi Li (liz@ms.xjb.ac.cn)

The copyright of individual parts of the supplement might differ from the article licence.

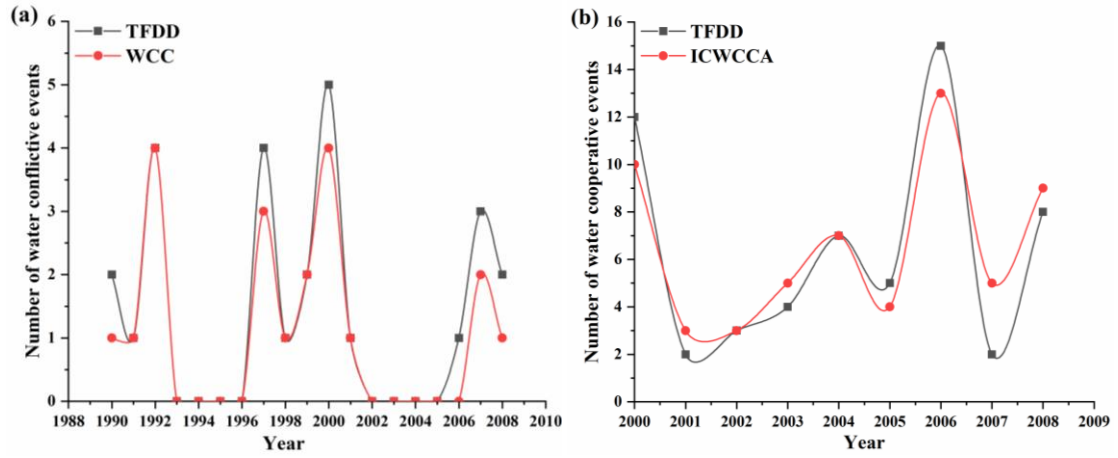

**Figure S1: Comparison of the number of water conflictive events in the TFDD and WCC datasets (a) and the number of water cooperative events in the TFDD and ICWCCA datasets (b).**
